# Supplementary material for: Spider phylosymbiosis: divergence of widow spider species and their tissues’ microbiomes
Source: PubMed Central journal article supplement (PMC7433143; doi:10.1186/s12862-020-01664-x), 2020-08-18
Supplement: 12862_2020_1664_MOESM1_ESM.pdf [file 12862_2020_1664_MOESM1_ESM.pdf]

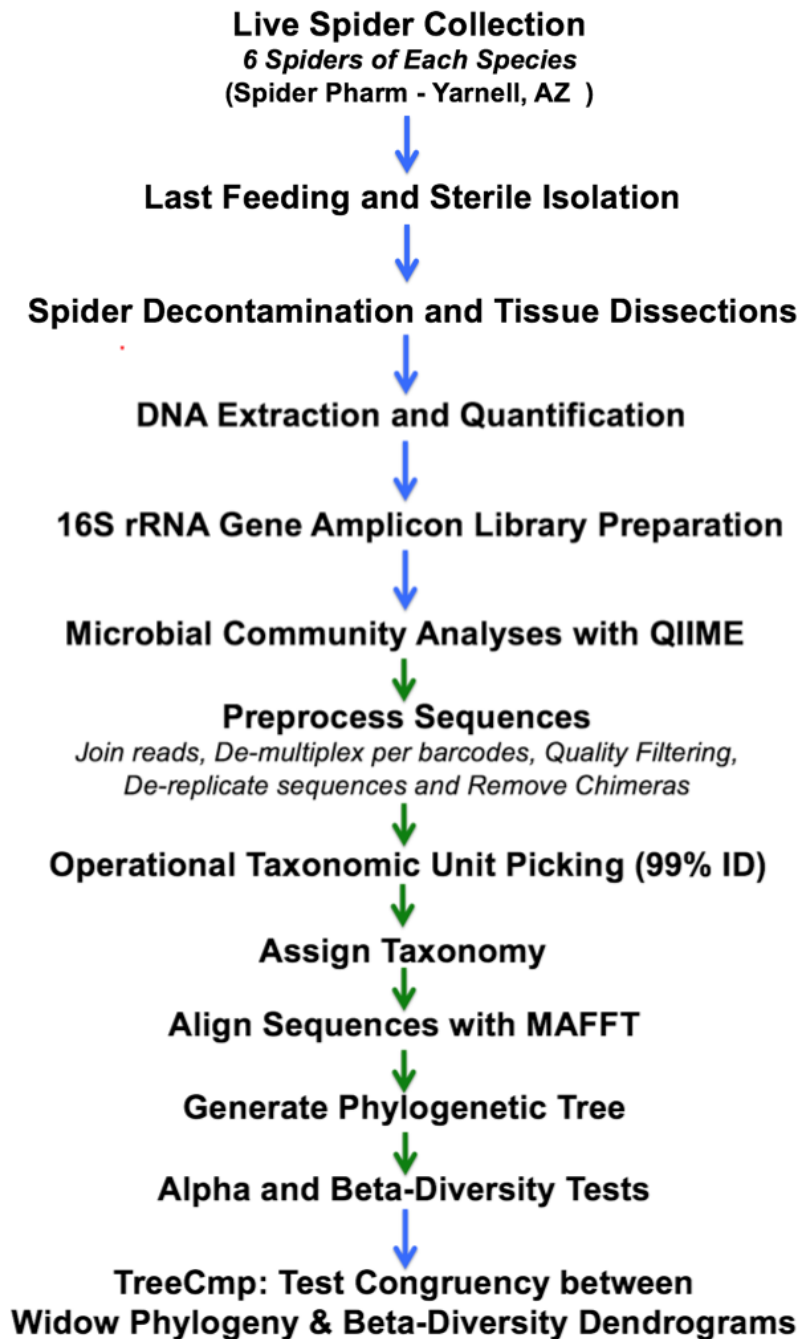

**Figure S1. Study Design Flowchart.** Overview of methods utilized to isolate, evaluate, and compare the microbiomes of our host spider species and their tissue samples.
