# Supplementary material for: Spider phylosymbiosis: divergence of widow spider species and their tissues’ microbiomes
Source: PubMed Central journal article supplement (PMC7433143; doi:10.1186/s12862-020-01664-x), 2020-08-18
Supplement: 12862_2020_1664_MOESM2_ESM.pdf [file 12862_2020_1664_MOESM2_ESM.pdf]

**Table S1. PCR 16S rRNA gene V1-V2 Primer Sequences.**

| Primer ID | Sequence (3'-5')                                                                  | Illumina Adaptor | Forward or Reverse | PCR-1 or PCR-2 |
|-----------|-----------------------------------------------------------------------------------|------------------|--------------------|----------------|
| 16sGenV1F | AGAGTTTGATCMTGGCTCA                                                               | n/a              | Forward            | PCR-1          |
| 16sGenV2R | GCTGCCTCCCGTAGGAGT                                                                | n/a              | Reverse            | PCR-1          |
| v1.SC501  | AATGATACGGCGACCACCGAGATCTACAC <b>ACGACGTG</b> TATGGTAATTTG<br>AGAGTTTGATCMTGGCTCA | i5               | Forward            | PCR-2          |
| v1.SC502  | AATGATACGGCGACCACCGAGATCTACAC <b>ATACACT</b> TATGGTAATTTG<br>AGAGTTTGATCMTGGCTCA  | i5               | Forward            | PCR-2          |
| v1.SC503  | AATGATACGGCGACCACCGAGATCTACAC <b>CGTCGCT</b> TATGGTAATTTG<br>AGAGTTTGATCMTGGCTCA  | i5               | Forward            | PCR-2          |
| v1.SC504  | AATGATACGGCGACCACCGAGATCTACAC <b>CTGCGTGT</b> TATGGTAATTTG<br>AGAGTTTGATCMTGGCTCA | i5               | Forward            | PCR-2          |
| v1.SC505  | AATGATACGGCGACCACCGAGATCTACAC <b>CTATCGAG</b> TATGGTAATTTG<br>AGAGTTTGATCMTGGCTCA | i5               | Forward            | PCR-2          |
| v1.SC506  | AATGATACGGCGACCACCGAGATCTACAC <b>CGTAGTGT</b> TATGGTAATTTG<br>AGAGTTTGATCMTGGCTCA | i5               | Forward            | PCR-2          |
| v1.SC507  | AATGATACGGCGACCACCGAGATCTACAC <b>GGATATCT</b> TATGGTAATTTG<br>AGAGTTTGATCMTGGCTCA | i5               | Forward            | PCR-2          |
| v1.SC508  | AATGATACGGCGACCACCGAGATCTACAC <b>TAGTGTAG</b> TATGGTAATTTG<br>AGAGTTTGATCMTGGCTCA | i5               | Forward            | PCR-2          |
| v2.SC701  | CAAGCAGAAGACGGCATAACGAGAT <b>ACCTACTG</b> AGTCAGTCAGGGGCTG<br>CCTCCCGTAGGAGT      | i7               | Reverse            | PCR-2          |
| v2.SC702  | CAAGCAGAAGACGGCATAACGAGAT <b>AGCGCTAT</b> AGTCAGTCAGGGGCTG<br>CCTCCCGTAGGAGT      | i7               | Reverse            | PCR-2          |
| v2.SC703  | CAAGCAGAAGACGGCATAACGAGAT <b>AGTCTAGA</b> AGTCAGTCAGGGGCTG<br>CCTCCCGTAGGAGT      | i7               | Reverse            | PCR-2          |
| v2.SC704  | CAAGCAGAAGACGGCATAACGAGAT <b>CAGTAGT</b> AGTCAGTCAGGGGCTG<br>CCTCCCGTAGGAGT       | i7               | Reverse            | PCR-2          |
| v2.SC705  | CAAGCAGAAGACGGCATAACGAGAT <b>CGTACTCA</b> AGTCAGTCAGGGGCTG<br>CCTCCCGTAGGAGT      | i7               | Reverse            | PCR-2          |
| v2.SC706  | CAAGCAGAAGACGGCATAACGAGAT <b>CTACCGAG</b> AGTCAGTCAGGGGCTG<br>CCTCCCGTAGGAGT      | i7               | Reverse            | PCR-2          |
| v2.SC707  | CAAGCAGAAGACGGCATAACGAGAT <b>GGAGACTA</b> AGTCAGTCAGGGGCTG<br>CCTCCCGTAGGAGT      | i7               | Reverse            | PCR-2          |
| v2.SC708  | CAAGCAGAAGACGGCATAACGAGAT <b>GGTATGCT</b> AGTCAGTCAGGGGCTG<br>CCTCCCGTAGGAGT      | i7               | Reverse            | PCR-2          |
| v2.SC709  | CAAGCAGAAGACGGCATAACGAGAT <b>GATGACG</b> AGTCAGTCAGGGGCTG<br>CCTCCCGTAGGAGT       | i7               | Reverse            | PCR-2          |
| v2.SC710  | CAAGCAGAAGACGGCATAACGAGAT <b>TAGACTGA</b> AGTCAGTCAGGGGCTG<br>CCTCCCGTAGGAGT      | i7               | Reverse            | PCR-2          |
| v2.SC711  | CAAGCAGAAGACGGCATAACGAGAT <b>TACGATG</b> AGTCAGTCAGGGGCTG<br>CCTCCCGTAGGAGT       | i7               | Reverse            | PCR-2          |
| v2.SC712  | CAAGCAGAAGACGGCATAACGAGAT <b>TCGAGCTC</b> AGTCAGTCAGGGGCTG<br>CCTCCCGTAGGAGT      | i7               | Reverse            | PCR-2          |
