# Supplementary material for: Spider phylosymbiosis: divergence of widow spider species and their tissues’ microbiomes
Source: PubMed Central journal article supplement (PMC7433143; doi:10.1186/s12862-020-01664-x), 2020-08-18
Supplement: 12862_2020_1664_MOESM3_ESM.pdf [file 12862_2020_1664_MOESM3_ESM.pdf]

**Table S2. Sequencing Primers.**

| <b>Primer ID:</b> | <b>Sequence:</b>                |
|-------------------|---------------------------------|
| <b>Read 1</b>     | TATGGTAATTTGAGAGTTTGATCMTGGCTCA |
| <b>Read 2</b>     | AGTCAGTCAGGGGCTGCCTCCCGTAGGAGT  |
| <b>Index Read</b> | ACTCCTACGGGAGGCAGCCCCTGACTGACT  |
