# Supplementary material for: Spider phylosymbiosis: divergence of widow spider species and their tissues’ microbiomes
Source: PubMed Central journal article supplement (PMC7433143; doi:10.1186/s12862-020-01664-x), 2020-08-18
Supplement: 12862_2020_1664_MOESM5_ESM.pdf [file 12862_2020_1664_MOESM5_ESM.pdf]

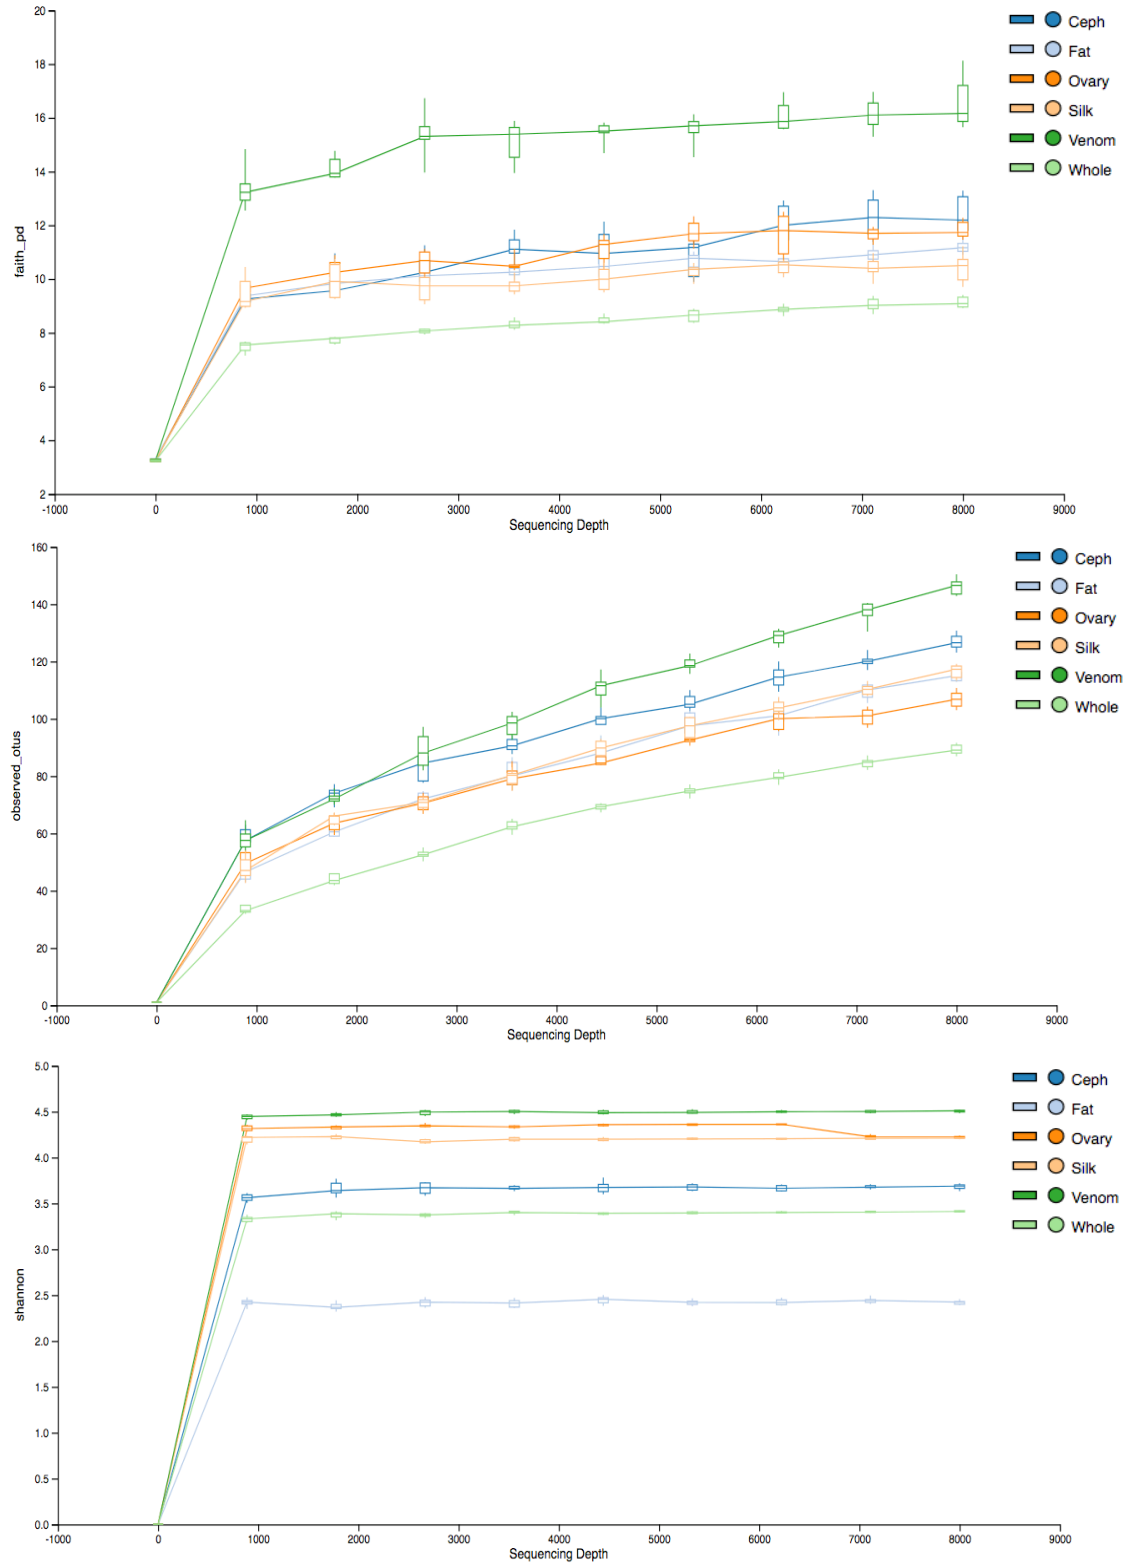

**Figure S2. QIIME 2 Microbial Alpha-Diversity Plots.** Alpha-Rarefaction results for Faith-PD (a), Observed OTUs (b), and Shannon Index (c) with Depth of Coverage at 8,000 rarified sequences.
