# Supplementary material for: Spider phylosymbiosis: divergence of widow spider species and their tissues’ microbiomes
Source: PubMed Central journal article supplement (PMC7433143; doi:10.1186/s12862-020-01664-x), 2020-08-18
Supplement: 12862_2020_1664_MOESM6_ESM.pdf [file 12862_2020_1664_MOESM6_ESM.pdf]

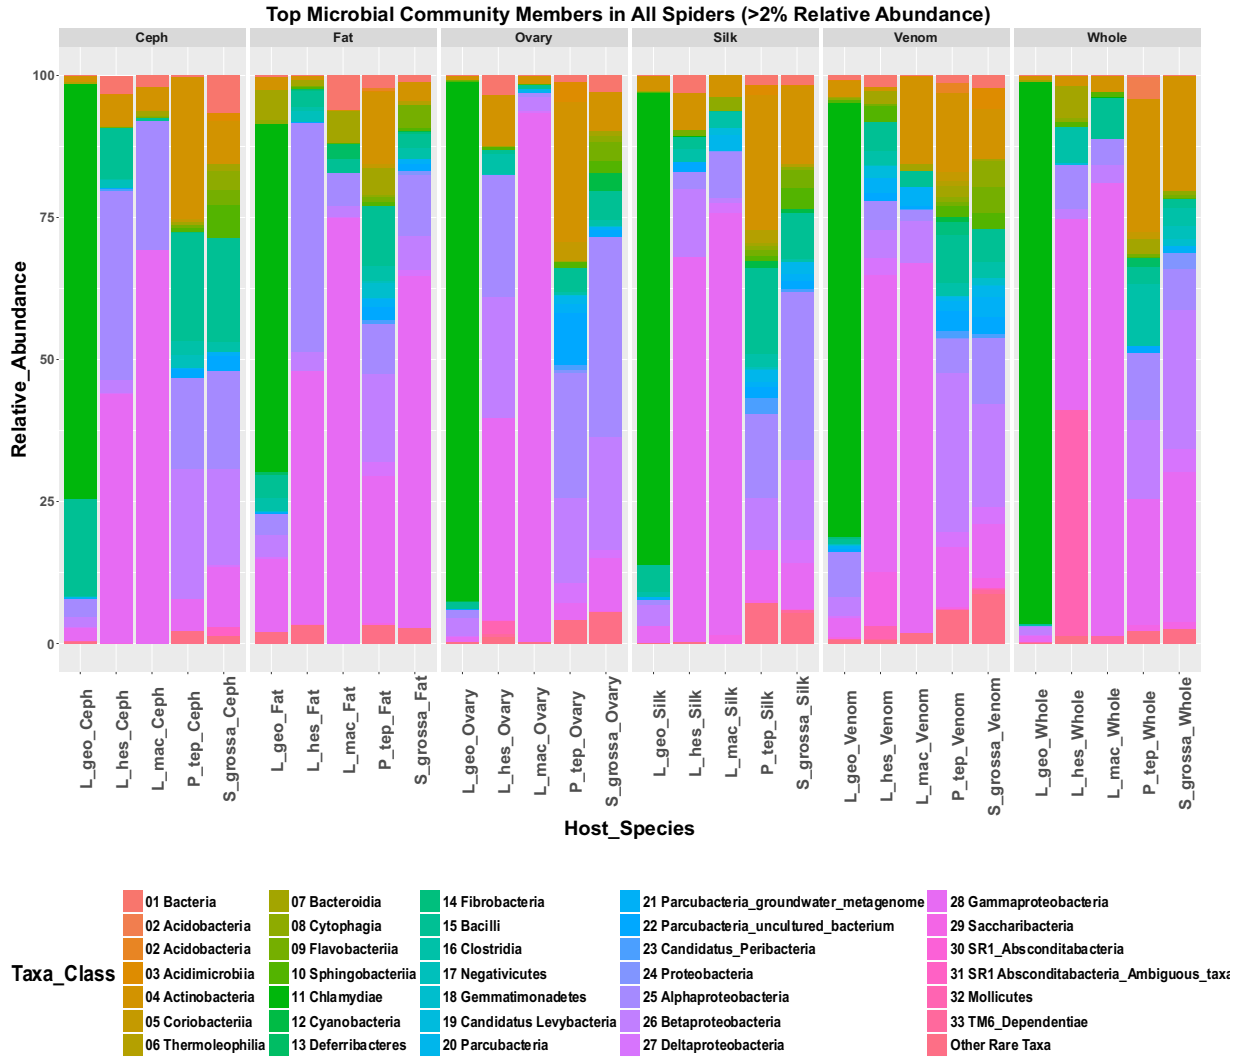

**Figure S3. Taxa Plots per Tissue Type – Level 3, Class.** Major microbial constituents by class (>2%) within each whole spider and tissue sample for each species (replicates grouped via mean-ceiling). Sample types as follows: Whole Spiders, Cephalothorax, Venom Glands, Ovary, Silk Glands, and Fat Tissue.
