# Supplementary material for: Spider phylosymbiosis: divergence of widow spider species and their tissues’ microbiomes
Source: PubMed Central journal article supplement (PMC7433143; doi:10.1186/s12862-020-01664-x), 2020-08-18
Supplement: 12862_2020_1664_MOESM7_ESM.pdf [file 12862_2020_1664_MOESM7_ESM.pdf]

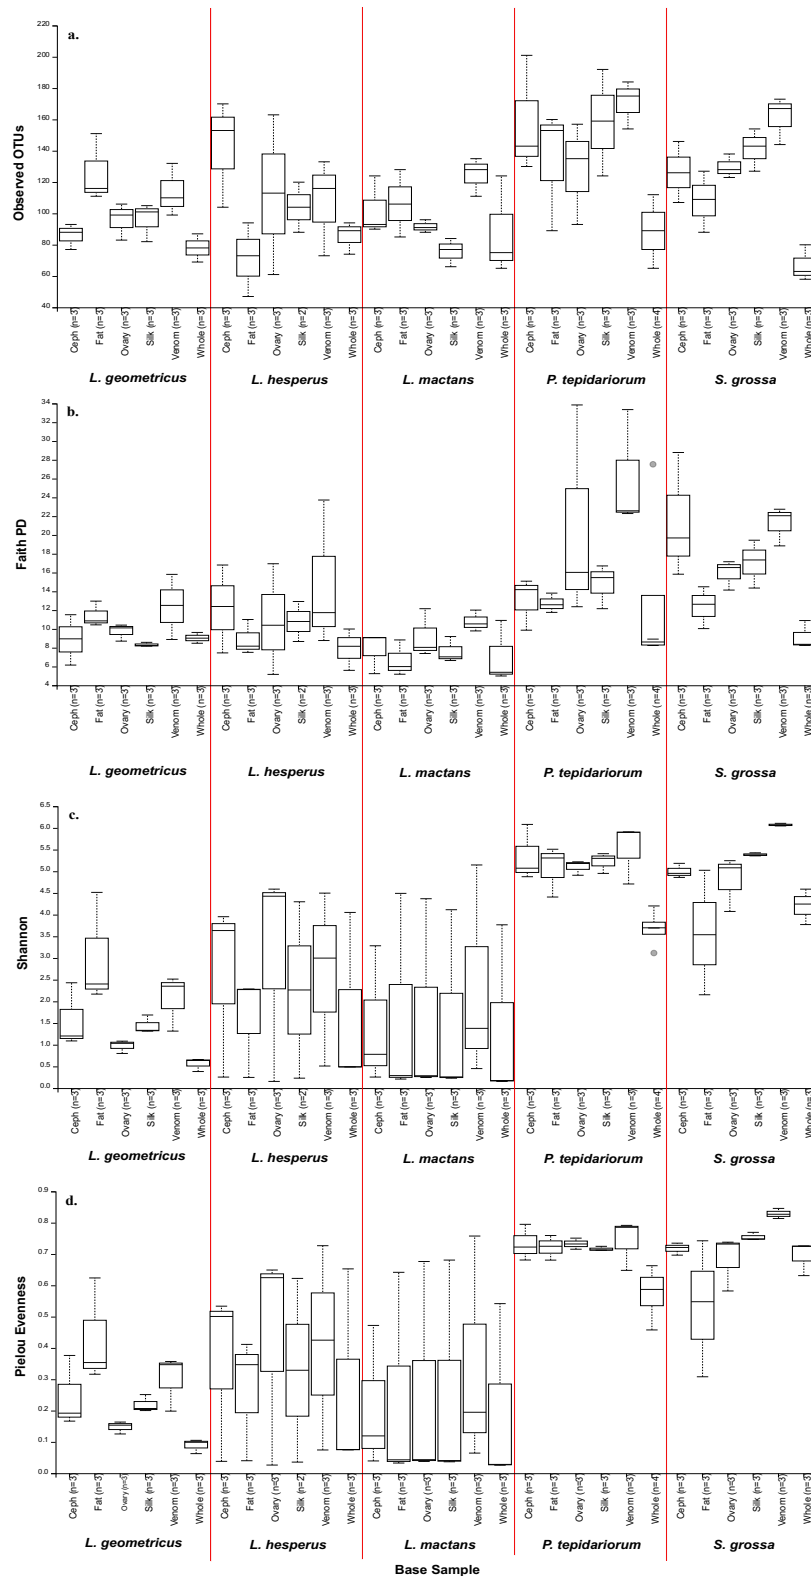

**Figure S4. QIIME 2 Alpha Diversity Group Significance Testing.** Box plots of alpha diversity tests grouped by base sample type. Overall Kruskal-Wallis p-value = 0.00028 (for all groups). (a) Observed OTUs, (b) Faith Phylogenetic-Diversity Index, (c) Shannon Index, (d) Pielou Evenness Index.
