# Supplementary material for: Spider phylosymbiosis: divergence of widow spider species and their tissues’ microbiomes
Source: PubMed Central journal article supplement (PMC7433143; doi:10.1186/s12862-020-01664-x), 2020-08-18
Supplement: 12862_2020_1664_MOESM8_ESM.pdf [file 12862_2020_1664_MOESM8_ESM.pdf]

Tables S4. Listings of venom gland (a) and silk gland (b) specific microbiota

| Table 4a: Venom Gland Specific Microbiota                        |                                                | Table 4b: Silk Gland Specific Microbiota            |                                           |
|------------------------------------------------------------------|------------------------------------------------|-----------------------------------------------------|-------------------------------------------|
| Taxa                                                             | Spider Species                                 | Taxa                                                | Spider Species                            |
| Aerococcaceae                                                    | <i>L. geometricus</i>                          | <i>Rickettsiales SM2D12</i>                         | <i>L. geometricus</i>                     |
| Arenimonas                                                       | <i>L. hesperus</i>                             | Carnobacteriaceae                                   | <i>L. geometricus</i>                     |
| Planctomycetes BD7-11                                            | <i>L. mactans</i>                              | Lachnospiraceae NK3A20 group                        | <i>L. mactans</i>                         |
| Pseudoclavibacter                                                | <i>L. mactans</i>                              | Sphingobacteriales NS11-12 marine group             | <i>S. grossa</i>                          |
| Idiomarina                                                       | <i>L. mactans</i>                              | Tepidisphaeraceae                                   | <i>S. grossa</i>                          |
| Acidimicrobiales                                                 | <i>L. mactans</i>                              | Devosia                                             | <i>S. grossa</i>                          |
| Myxococcales Biri41                                              | <i>S. grossa</i>                               | Betaproteobacteria SC-I-84                          | <i>S. grossa</i>                          |
| Cytophagaceae                                                    | <i>S. grossa</i>                               | Shewanella                                          | <i>S. grossa</i>                          |
| Deltaproteobacteria NB1-j                                        | <i>S. grossa</i>                               | Sporichthyaceae                                     | <i>S. grossa</i>                          |
| Ramlibacter                                                      | <i>S. grossa</i>                               | Gaiellales                                          | <i>S. grossa</i>                          |
| Rhodocyclaceae                                                   | <i>S. grossa</i>                               | Myxococcales KD3-10                                 | <i>S. grossa</i>                          |
| Pseudolabrys                                                     | <i>S. grossa</i>                               | Rheinheimera                                        | <i>S. grossa</i>                          |
| Saprosiraceae                                                    | <i>S. grossa</i>                               | Myxococcales                                        | <i>S. grossa</i>                          |
| SAR324 clade (Marine group B) - uncultured delta proteobacterium | <i>S. grossa</i>                               | Bacillaceae                                         | <i>P. tepidariorum</i>                    |
| Tabrizicola                                                      | <i>S. grossa</i>                               | Mogibacterium                                       | <i>P. tepidariorum</i>                    |
| Nannocystis                                                      | <i>S. grossa</i>                               | Verrucomicrobia S-BQ2-57 soil group                 | <i>P. tepidariorum</i>                    |
| Candidatus Moranbacteria                                         | <i>S. grossa</i>                               | Abiotrophia                                         | <i>P. tepidariorum</i>                    |
| Clostridiaceae 1                                                 | <i>S. grossa</i>                               | Comamonadaceae                                      | <i>P. tepidariorum</i>                    |
| Emticicia                                                        | <i>S. grossa</i>                               | Candidatus Peribacteria uncultured sludge bacterium | <i>P. tepidariorum</i>                    |
| Alphaproteobacteria Incertae Sedis                               | <i>S. grossa</i>                               | Oligoflexus                                         | <i>P. tepidariorum</i>                    |
| Clostridiisalibacter                                             | <i>S. grossa</i>                               | [Eubacterium] hallii group                          | <i>P. tepidariorum</i>                    |
| Pseudonocardiaceae                                               | <i>S. grossa</i>                               | Intrasporangiaceae                                  | <i>P. tepidariorum</i>                    |
| Gemmatirosa                                                      | <i>S. grossa</i>                               | Acidimicrobiales                                    | <i>P. tepidariorum</i>                    |
| Edaphobacter                                                     | <i>P. tepidariorum</i>                         | Coprobacter                                         | <i>P. tepidariorum</i>                    |
| Ruminococcaceae UCG-005                                          | <i>P. tepidariorum</i>                         | Propionibacteriaceae                                | <i>P. tepidariorum</i>                    |
| Angustibacter                                                    | <i>P. tepidariorum</i>                         | Planococcaceae                                      | <i>P. tepidariorum</i>                    |
| Nostoc                                                           | <i>P. tepidariorum</i>                         | Acidobacteria Subgroup 6                            | <i>P. tepidariorum</i>                    |
| Frankiales                                                       | <i>P. tepidariorum</i>                         | Fillimonas                                          | <i>P. tepidariorum</i>                    |
| Desulfosporosinus                                                | <i>P. tepidariorum</i>                         | Chloroflexi TK10                                    | <i>P. tepidariorum</i>                    |
| Truepera                                                         | <i>P. tepidariorum</i>                         | Candidatus Peribacteria                             | <i>S. grossa</i> & <i>P. tepidariorum</i> |
| Asticcacaulis                                                    | <i>P. tepidariorum</i>                         |                                                     |                                           |
| Paenalcaligenes                                                  | <i>P. tepidariorum</i>                         |                                                     |                                           |
| Blautia                                                          | <i>P. tepidariorum</i>                         |                                                     |                                           |
| Lachnoanaerobaculum                                              | <i>P. tepidariorum</i>                         |                                                     |                                           |
| Leadbetterella                                                   | <i>P. tepidariorum</i>                         |                                                     |                                           |
| Longimicrobiaceae                                                | <i>P. tepidariorum</i>                         |                                                     |                                           |
| Desulfovermiculus                                                | <i>P. tepidariorum</i>                         |                                                     |                                           |
| Sphingobacteriales PHOS-HE51                                     | <i>P. tepidariorum</i>                         |                                                     |                                           |
| Elusimicrobia Lineage IV                                         | <i>P. tepidariorum</i>                         |                                                     |                                           |
| Rikenellaceae dgA-11 gut group                                   | <i>P. tepidariorum</i>                         |                                                     |                                           |
| Alloprevotella                                                   | <i>P. tepidariorum</i>                         |                                                     |                                           |
| Curtobacterium                                                   | <i>P. tepidariorum</i>                         |                                                     |                                           |
| Haliae                                                           | <i>P. tepidariorum</i>                         |                                                     |                                           |
| Caulobacteraceae                                                 | <i>P. tepidariorum</i>                         |                                                     |                                           |
| Pseudoxanthomonas                                                | <i>P. tepidariorum</i>                         |                                                     |                                           |
| Bilophila                                                        | <i>P. tepidariorum</i>                         |                                                     |                                           |
| Cryobacterium                                                    | <i>P. tepidariorum</i>                         |                                                     |                                           |
| Bacillaceae                                                      | <i>P. tepidariorum</i>                         |                                                     |                                           |
| Solirubrobacterales 0319-6M6                                     | <i>P. tepidariorum</i>                         |                                                     |                                           |
| Variovorax                                                       | <i>L. mactans</i> & <i>S. grossa</i>           |                                                     |                                           |
| Psychrobacter                                                    | <i>L. geometricus</i> & <i>P. tepidariorum</i> |                                                     |                                           |
