# Supplementary material for: Spider phylosymbiosis: divergence of widow spider species and their tissues’ microbiomes
Source: PubMed Central journal article supplement (PMC7433143; doi:10.1186/s12862-020-01664-x), 2020-08-18
Supplement: 12862_2020_1664_MOESM9_ESM.pdf [file 12862_2020_1664_MOESM9_ESM.pdf]

**Table S5. Listings of ovary gland (a) and fat tissue (b) specific microbiota**

| <b>Table 5a: Ovary Specific Microbiota</b>                     |                                        | <b>Table 5b: Fat Tissue Specific Microbiota</b> |                                             |
|----------------------------------------------------------------|----------------------------------------|-------------------------------------------------|---------------------------------------------|
| <b>Taxa</b>                                                    | <b>Spider Species</b>                  | <b>Taxa</b>                                     | <b>Spider Species</b>                       |
| <i>Spirochaeta 2</i>                                           | <i>L. geometricus</i>                  | <i>Ktedonobacteraceae</i>                       | <i>L. geometricus</i>                       |
| <i>Pseudarthrobacter</i>                                       | <i>L. geometricus</i>                  | <i>Dyadobacter</i>                              | <i>L. geometricus</i>                       |
| <i>Rhizobiales A0839</i>                                       | <i>L. geometricus</i>                  | <i>[Eubacterium] coprostanoligenes group</i>    | <i>L. geometricus</i>                       |
| <i>Sphingobacteriales AKYH767</i>                              | <i>L. geometricus</i>                  | <i>Peptococcaceae</i>                           | <i>L. geometricus</i>                       |
| <i>Sideroxydans</i>                                            | <i>L. geometricus</i>                  | <i>Megamonas</i>                                | <i>L. hesperus</i>                          |
| <i>SR1 (Absconditabacteria)</i>                                | <i>L. hesperus</i>                     | <i>Fusobacteriales</i>                          | <i>L. hesperus</i>                          |
| <i>Lysobacter</i>                                              | <i>L. mactans</i>                      | <i>Tolumonas</i>                                | <i>L. hesperus</i>                          |
| <i>Blastocatellaceae (Subgroup 4)</i>                          | <i>L. mactans</i>                      | <i>Gaiellales</i>                               | <i>S. grossa</i>                            |
| <i>Roseomonas</i>                                              | <i>S. grossa</i>                       | <i>Halanaerobiales ODP1230B8.23</i>             | <i>S. grossa</i>                            |
| <i>Candidatus Yanofskybacteria bacterium GW2011 GWA2 41 22</i> | <i>S. grossa</i>                       | <i>Clostridium sensu stricto 12</i>             | <i>S. grossa</i>                            |
| <i>Peredibacter</i>                                            | <i>S. grossa</i>                       | <i>Solibacillus</i>                             | <i>S. grossa</i>                            |
| <i>Vampirovibrionales</i>                                      | <i>S. grossa</i>                       | <i>Oligoflexaceae</i>                           | <i>S. grossa</i>                            |
| <i>Myxococcales mle1-27</i>                                    | <i>S. grossa</i>                       | <i>Solirubrobacterales FFCH11085</i>            | <i>S. grossa</i>                            |
| <i>Candidatus Azambacteria</i>                                 | <i>S. grossa</i>                       | <i>Ruminococcus 1</i>                           | <i>S. grossa</i>                            |
| <i>Woodsholea</i>                                              | <i>S. grossa</i>                       | <i>Candidatus Solibacter</i>                    | <i>S. grossa</i>                            |
| <i>Thermomicrobia JG30-KF-CM45</i>                             | <i>P. tepidariorum</i>                 | <i>Eubacteriaceae</i>                           | <i>S. grossa</i>                            |
| <i>Chloroflexi KD4-96</i>                                      | <i>P. tepidariorum</i>                 | <i>Actinobacillus</i>                           | <i>P. tepidariorum</i>                      |
| <i>Verrucomicrobia WCHB1-41</i>                                | <i>P. tepidariorum</i>                 | <i>Pusillimonas</i>                             | <i>P. tepidariorum</i>                      |
| <i>Coxiella</i>                                                | <i>P. tepidariorum</i>                 | <i>Spongiibacteraceae BD1-7 clade</i>           | <i>P. tepidariorum</i>                      |
| <i>Beggiatoa</i>                                               | <i>P. tepidariorum</i>                 | <i>Ardenticatenales</i>                         | <i>P. tepidariorum</i>                      |
| <i>Ignavibacteriales SR-FBR-L83</i>                            | <i>P. tepidariorum</i>                 | <i>Geodermatophilaceae</i>                      | <i>P. tepidariorum</i>                      |
| <i>Candidatus Falkowbacteria</i>                               | <i>L. geometricus &amp; L. mactans</i> | <i>Actinobacteria MB-A2-108</i>                 | <i>P. tepidariorum</i>                      |
|                                                                |                                        | <i>Peptococcus</i>                              | <i>P. tepidariorum</i>                      |
|                                                                |                                        | <i>Gemmatimonas</i>                             | <i>L. geometricus &amp; P. tepidariorum</i> |
