# Supplementary material for: Spider phylosymbiosis: divergence of widow spider species and their tissues’ microbiomes
Source: PubMed Central journal article supplement (PMC7433143; doi:10.1186/s12862-020-01664-x), 2020-08-18
Supplement: 12862_2020_1664_MOESM10_ESM.pdf [file 12862_2020_1664_MOESM10_ESM.pdf]

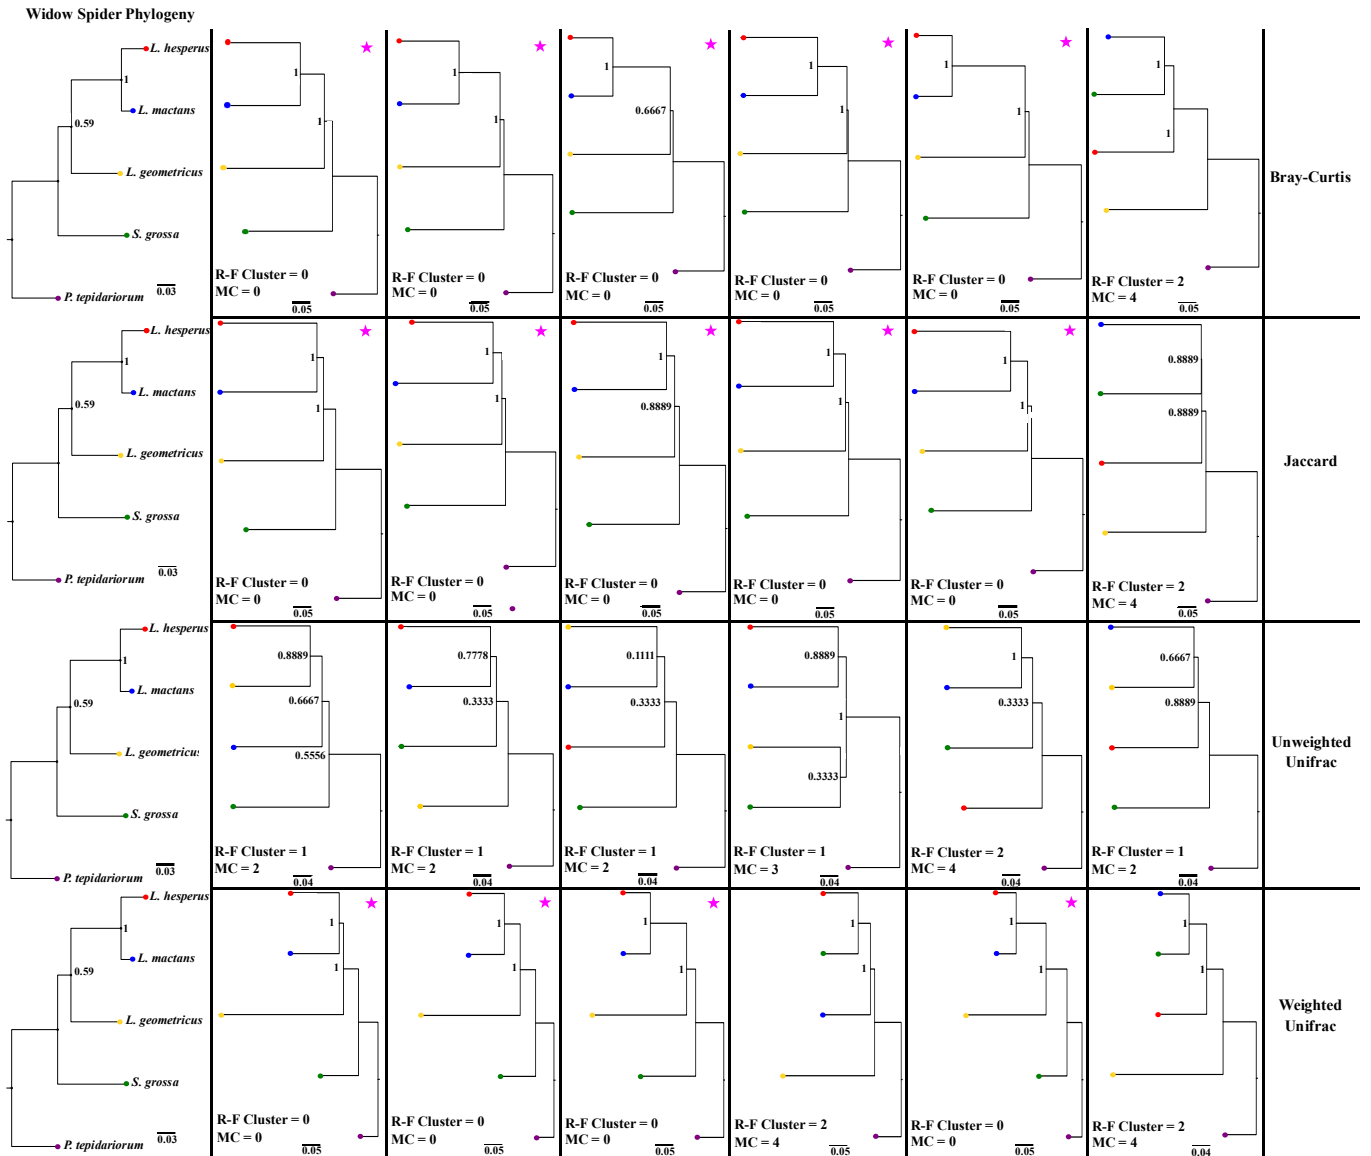

**Figure S4. Phylosymbiosis between Widow Phylogeny and Microbiota Dendrogram Relationships.** Congruency between widow related spider phylogeny and beta-diversity dendrograms was measured via Robinson-Foulds Cluster (R-F Cluster) metric, where a value of 0 = complete congruence and 2 = incomplete incongruence. Matching Cluster (MC) Metric also accounts for incongruency between closely related branches of rooted trees and a value of 0 also indicates complete congruence between compared trees. Pink asterisks are utilized to denote phylosymbiotic relationships between the widow phylogeny and microbial dendrogram.
