# Supplementary material for: Spider phylosymbiosis: divergence of widow spider species and their tissues’ microbiomes
Source: PubMed Central journal article supplement (PMC7433143; doi:10.1186/s12862-020-01664-x), 2020-08-18
Supplement: 12862_2020_1664_MOESM11_ESM.pdf [file 12862_2020_1664_MOESM11_ESM.pdf]

**Table S6. Microbial transcripts detected in RNA sequencing datasets from silk, venom and/ or ovary glands.**

| <b>RNA-Seq Data: Microbial Transcripts in Silk, Venom and/or Ovary Glands</b> |                |                             |                         |                              |                           |
|-------------------------------------------------------------------------------|----------------|-----------------------------|-------------------------|------------------------------|---------------------------|
| <b>Taxa Name</b>                                                              | <b>Taxa ID</b> | <b><i>P. tepidiorum</i></b> | <b><i>S. grossa</i></b> | <b><i>L. geometricus</i></b> | <b><i>L. hesperus</i></b> |
| <i>Acidimicrobiaceae</i>                                                      | 84994          | -                           | -                       | Silk Only                    | -                         |
| <i>Acidipropionibacterium</i>                                                 | 1912215        | -                           | Ovary Only              | -                            | -                         |
| <i>Acidovorax</i>                                                             | 12916          | Silk & Venom                | -                       | -                            | -                         |
| <i>Actinobaculum</i>                                                          | 76833          | -                           | Ovary Only              | -                            | -                         |
| <i>Actinomyces</i>                                                            | 1654           | -                           | Venom & Ovary           | -                            | -                         |
| <i>Arthrospira</i>                                                            | 35823          | -                           | Ovary Only              | -                            | -                         |
| <i>Alicyciphilus</i>                                                          | 201096         | Venom Only                  | -                       | -                            | -                         |
| <i>Atopobium</i>                                                              | 1380           | -                           | -                       | -                            | Venom Only                |
| <i>Azospira</i>                                                               | 146937         | Venom Only                  | -                       | -                            | -                         |
| <i>Bordetella</i>                                                             | 517            | Silk & Venom                | -                       | -                            | -                         |
| <i>Bradyrhizobiaceae</i>                                                      | 41294          | -                           | -                       | -                            | Silk Only                 |
| <i>Brochothrix</i>                                                            | 2755           | -                           | -                       | -                            | Ovary Only                |
| <i>Campylobacter</i>                                                          | 194            | -                           | -                       | Silk Only                    | -                         |
| <i>Candidatus Carsonella</i>                                                  | 114185         | -                           | -                       | -                            | Venom Only                |
| <i>Candidatus Riesia</i>                                                      | 401618         | -                           | -                       | Venom Only                   | -                         |
| <i>Capnocytophaga</i>                                                         | 1016           | -                           | Ovary Only              | -                            | Ovary Only                |
| <i>Cardiobacterium</i>                                                        | 2717           | -                           | Venom Only              | Silk Only                    | -                         |
| <i>Chlamydia</i>                                                              | 810            | -                           | Venom & Ovary           | -                            | Venom Only                |
| <i>Christensenella</i>                                                        | 990721         | -                           | -                       | -                            | Venom Only                |
| <i>Chryseobacterium</i>                                                       | 59732          | Venom Only                  | -                       | -                            | -                         |
| <i>Citrobacter</i>                                                            | 544            | Venom Only                  | -                       | -                            | -                         |
| <i>Comamonas</i>                                                              | 283            | Silk & Venom                | -                       | -                            | -                         |
| <i>Commensalibacter</i>                                                       | 1079922        | -                           | -                       | -                            | Ovary Only                |
| <i>Cutibacterium</i>                                                          | 1912216        | -                           | Venom & Ovary           | Venom Only                   | Venom & Ovary             |
| <i>Dechloromonas</i>                                                          | 73029          | Silk & Venom                | -                       | -                            | -                         |
| <i>Dolosigranulum</i>                                                         | 29393          | -                           | Venom & Ovary           | -                            | Venom & Ovary             |
| <i>Elizabethkingia</i>                                                        | 308865         | Silk & Venom                | -                       | Venom Only                   | -                         |
| <i>Empedobacter</i>                                                           | 59734          | -                           | Venom Only              | -                            | -                         |
| <i>Enhydrobacter</i>                                                          | 212791         | Venom Only                  | -                       | -                            | -                         |
| <i>Enterobacter</i>                                                           | 547            | Silk & Venom                | -                       | -                            | -                         |
| <i>Exiguobacterium</i>                                                        | 33986          | -                           | -                       | Silk Only                    | -                         |
| <i>Fingoldia</i>                                                              | 150022         | -                           | Venom Only              | -                            | -                         |
| <i>Flavihumibacter</i>                                                        | 1004301        | -                           | Silk Only               | -                            | -                         |
| <i>Fusobacterium</i>                                                          | 848            | -                           | -                       | Silk Only                    | -                         |
| <i>Geobacter</i>                                                              | 28231          | Ovary Only                  | -                       | -                            | -                         |
| <i>Granulicatella</i>                                                         | 117563         | -                           | -                       | Silk Only                    | -                         |
| <i>Herbaspirillum</i>                                                         | 963            | -                           | -                       | Venom Only                   | -                         |
| <i>Kocuria</i>                                                                | 57493          | -                           | -                       | -                            | -                         |
| <i>Lactobacillus</i>                                                          | 1578           | -                           | Silk Only               | -                            | -                         |
| <i>Melaminivora</i>                                                           | 1649468        | Venom Only                  | -                       | -                            | -                         |
| <i>Mycobacterium</i>                                                          | 1763           | -                           | -                       | -                            | Venom Only                |
| <i>Ochrobactrum</i>                                                           | 528            | -                           | -                       | -                            | Venom Only                |
| <i>Neisseria</i>                                                              | 482            | -                           | Ovary Only              | -                            | -                         |
| <i>Paenibacillus</i>                                                          | 44249          | Venom Only                  | -                       | -                            | -                         |
| <i>Pantoea</i>                                                                | 53335          | Venom Only                  | -                       | -                            | -                         |
| <i>Parvimonas</i>                                                             | 543311         | -                           | -                       | Venom Only                   | -                         |
| <i>Peptoniphilus</i>                                                          | 162289         | Venom Only                  | Ovary Only              | -                            | Ovary Only                |
| <i>Prevotella</i>                                                             | 838            | -                           | Ovary Only              | -                            | -                         |
| <i>Polynucleobacter</i>                                                       | 44013          | Venom Only                  | -                       | -                            | -                         |
| <i>Porphyromonas</i>                                                          | 836            | -                           | -                       | Silk Only                    | -                         |
| <i>Pseudoxanthomonas</i>                                                      | 83618          | -                           | Venom Only              | -                            | -                         |
| <i>Rothia</i>                                                                 | 32207          | -                           | Venom & Ovary           | Silk & Venom                 | Ovary Only                |
| <i>Salmonella</i>                                                             | 590            | -                           | -                       | Ovary Only                   | Venom & Ovary             |
| <i>Serratia</i>                                                               | 613            | -                           | Venom & Ovary           | Venom & Ovary                | Venom & Ovary             |
| <i>Sphingobacterium</i>                                                       | 28453          | Venom Only                  | -                       | -                            | -                         |
| <i>Tsukamurella</i>                                                           | 2060           | Silk & Venom                | -                       | -                            | -                         |
| <i>Xanthomonas</i>                                                            | 338            | Venom Only                  | -                       | -                            | -                         |
| <i>Xenorhabdus</i>                                                            | 626            | -                           | -                       | -                            | Venom Only                |
